# Supplementary material for: Effect of Hand Hygiene Program Among School Children in Bangladesh
Source: Research Square preprint supplement (doi:10.21203/rs.3.rs-7358688/v1), 2025-08-14
Supplement: Supplementary file 1 [file b192febb5c74e49ed8639c0e.docx]

**Effect of Hand Hygiene Program Among School Children in Bangladesh**

**TREND Checklist (Transparent Reporting of Evaluations with Nonrandomized Designs)**

| **Item** | **Descriptor** | **Reported in Manuscript**  **(Page/Section)** |
| --- | --- | --- |
| 1. Title and Abstract | Information on how units were allocated to interventions | Title & Abstract (p.1) |
| 2. Background | Scientific background and explanation of rationale | Introduction (p.2–5) |
| 3. Objectives | Specific objectives and hypotheses | End of Introduction (p.5) |
| 4. Participants | Eligibility criteria, recruitment method, and settings | Method:Participants (p.6–7) |
| 5. Interventions | Details of the intervention: content, delivery, provider, intensity, setting | Method: Hand Hygiene Program (p.11–12) |
| 6. Outcomes | Definition and assessment of primary and secondary outcomes | Method: Instruments (p.7–8), Results (p.13–19) |
| 7. Sample Size | How sample size was determined | Method: Sample Size (p.6) |
| 8. Assignment Method | Method used to assign units to study conditions | Quasi-experimental one-group (p.6) |
| 9. Blinding | Whether participants, administrators, or outcome assessors were blinded | Not blinded (explicit in Method, p.6–7) |
| 10. Unit of Analysis | Description of the unit of analysis and statistical methods | Method: Data Analysis (p.13), Results |
| 11. Statistical Methods | Statistical methods used to compare groups and adjust for confounders | Method: Data Analysis (p.13), Results |
| 12. Participant Flow | Flow of participants through each stage (enrollment, intervention, follow-up, analysis) | Described in Methods & Results; Flow diagram recommended |
| 13. Recruitment | Dates defining recruitment and follow-up | Method (p.6: Jan–Feb 2023) |
| 14. Baseline Data | Baseline characteristics of participants | Results (p.13–14) |
| 15. Baseline Equivalence | Baseline comparisons if applicable | Results:Homogeneity tests (p.19) |
| 16. Numbers Analyzed | Number of participants in each analysis | Result(n=40, throughout) |
| 17. Outcomes & Estimation | Summary of results for each outcome | Results:(p.14–19) |
| 18. Ancillary Analyses | Subgroup or adjusted analyses | Results:demographic variables (p.19–20) |
| 19. Adverse Events | Summary of harms or unintended effects | Not applicable |
| 20. Interpretation | Interpretation of results, implications, and limitations | Discussion (p.20–22) |
| 21. Generalizability | Generalizability of the findings | Conclusion (p.22–23) |
| 22. Overall Evidence | Summary of findings in context of existing evidence | Discussion & References (p.20–25) |
